# Supplementary material for: Potentially Harmful Elements Associated with Dust of Mosques: Pollution Status, Sources, and Human Health Risks
Source: MDPI journal article supplement (doi:10.3390/ijerph20032687), 2023-02-02
Supplement: s1 [file s1]

## SUPPLEMENTARY INFORMATION

**Table S1:** Values of risk parameters used for calculating HQs and ILCRs for children and adults exposed to PHEs associated with ACFD of mosques.

| Factor | Description                                     | Value                          |                                | References                                  |
|--------|-------------------------------------------------|--------------------------------|--------------------------------|---------------------------------------------|
|        |                                                 | Children                       | Adults                         |                                             |
| C      | Concentration of PHEs in dusts (mg/kg)          |                                |                                | Present study                               |
| IngR   | Ingestion rate of dust (mg/day)                 | 200                            | 100                            | USEPA [1]; Gope et al. [2]                  |
| EF     | Exposure frequency (days/year)                  | (2.5h/24h)*350 =38.02 day/year | (2.5h/24h)*350 =38.02 day/year | Peng et al. [3]; Zheng et al. [4]; ESAG [5] |
| ED     | Exposure duration (years)                       | 6                              | 24                             | USEPA [6]; USEPA [7,8]                      |
| BW     | Average body weight (kg)                        | 15                             | 70                             | Hu et al. [9]; Lu et al. [10]; USEPA [11]   |
| AT     | Average time (non-carcinogenic effects) (days)  | ED x 365                       | ED x 365                       | USEPA [12]                                  |
| AT     | Average time (carcinogenic effects) (days)      | 70 yr x365                     | 70 yr x365                     | USEPA [12]                                  |
| CF     | Conversion factor (kg/mg)                       | 1 x 10 <sup>-6</sup>           | 1 x 10 <sup>-6</sup>           | Li et al. (2011)                            |
| InhR   | Inhalation rate of dust (m <sup>3</sup> /day)   | 7.63                           | 12.8                           | Li et al. [13]; USEPA [6]                   |
| PEF    | Particular emission factor (m <sup>3</sup> /kg) | 1.36x10 <sup>9</sup>           | 1.36x10 <sup>9</sup>           | USEPA [7,8]                                 |
| SA     | Exposed surface area of skin (cm <sup>2</sup> ) | 1600                           | 4350                           | Zheng et al. [4]; ESAG [5]                  |
| AF     | Skin adherence factor (mg/cm <sup>2</sup> )     | 0.2                            | 0.7                            | USEPA [1]                                   |
| ABF    | Absorption factor (Dermal)                      | 0.001                          | 0.001                          | Wei et al. [14]; USEPA [7,8]                |

**Table S2:** Reference Doses ( $RfD$ ,  $mg\ kg^{-1}\ day^{-1}$ ) of different PHEs used to calculate HQs.

|                | Fe       | Mn       | Zn       | Pb       | Cd       | V        | Co.      | Ni       | As       | Cr       | Cu       | References                                 |
|----------------|----------|----------|----------|----------|----------|----------|----------|----------|----------|----------|----------|--------------------------------------------|
| $RfD_{ing}$    | 8.40E+00 | 4.70E-02 | 3.00E-01 | 3.50E-03 | 1.00E-03 | 7.00E-03 | 2.00E-02 | 2.00E-02 | 3.00E-04 | 3.00E-03 | 4.00E-02 | Ali et al., [15];<br>Shabbaj et al., [16], |
| $RfD_{inh}$    | 2.20E-04 | 1.43E-05 | 3.00E-01 | 3.52E-03 | 1.00E-03 | 7.00E-03 | 5.71E-06 | 2.06E-02 | 3.01E-04 | 2.86E-05 | 4.02E-02 | Li et al., [17];<br>Alghamdi et al., [18]  |
| $RfD_{dermal}$ | 7.00E-02 | 1.84E-03 | 6.00E-02 | 5.25E-04 | 1.00E-05 | 7.00E-05 | 1.60E-02 | 5.40E-03 | 1.23E-04 | 5.00E-05 | 1.20E-02 |                                            |

**Table S3:** Carcinogenic Slope Factor (CSF,  $(mg\ kg^{-1}\ day^{-1})^{-1}$ ) of different PTEs used to calculate CR [19].

|    | CSF          |              |                | References                                                                          |
|----|--------------|--------------|----------------|-------------------------------------------------------------------------------------|
|    | $CSF_{Ing.}$ | $CSF_{Inh.}$ | $CSF_{Dermal}$ |                                                                                     |
| Cr | 0.50         | 42.00        | 20.00          | Zheng et al. [20]; Kamunda et al. [21]; Ying et al. [22]; Adimalla [23]             |
| Ni | 1.70         | 0.84         | 42.50          | Huang et al. [24]; Lu et al. [25]; Adimalla [23]                                    |
| Cd | 0.38         | 0.38         | 6.10           | Lu et al. [25]; Kamunda et al. [21]                                                 |
| Pb | 0.01         | 0.04         | 0.01           | Pavilonis et al. [26]; Kamunda et al. [21]; Bello et al. [27]; Johnbull et al. [28] |
| Co | -            | 9.80         | -              | Lu et al. [25]; Zheng et al. [20]; Bello et al. [27]                                |
| As | 1.50         | 1.50         | 7.50           | Lu et al. [25]; Ying et al. [22]; Pavilonis et al. [26]                             |

**Table S4.** Geo-accumulation index ( $I_{geo}$ ), contamination factor ( $C_f$ ), degree of contamination ( $C_d$ ) and pollution load index ( $PLI$ ) of PHEs in ACFD of Jubail, Dammam metropolitan and Jeddah mosques

|                             |                               | Potentially harmful elements (PHEs) |      |       |       |       |       |         |       |      |       |       |
|-----------------------------|-------------------------------|-------------------------------------|------|-------|-------|-------|-------|---------|-------|------|-------|-------|
|                             |                               | As                                  | Cd   | Co    | Cr    | Cu    | Fe    | Mn      | Ni    | Pb   | V     | Zn    |
| Jubail mosques              | I <sub>geo</sub> <sup>a</sup> | 0.67                                | 1.86 | -3.06 | -1.73 | 0.96  | -2.94 | -1.89   | -1.36 | 1.44 | -2.84 | 2.86  |
|                             | I <sub>geo</sub> <sup>b</sup> | 0.35                                | 0.86 | -0.59 | -0.45 | 2.41  | -1.36 | -1.01   | 0.40  | 1.17 | -0.87 | 2.65  |
| Dammam metropolitan mosques | I <sub>geo</sub> <sup>a</sup> | 0.75                                | 2.01 | -2.47 | -1.55 | 1.34  | -2.94 | -2.39   | -1.21 | 1.53 | -2.64 | 2.99  |
|                             | I <sub>geo</sub> <sup>b</sup> | 0.43                                | 1.01 | -0.07 | -0.28 | 2.78  | -1.32 | -1.52   | 0.54  | 1.25 | -0.68 | 2.78  |
| Jeddah mosques              | I <sub>geo</sub> <sup>a</sup> | 0.46                                | 2.25 | -1.89 | -0.81 | 1.38  | -2.47 | -2.06   | -1.18 | 2.56 | -1.74 | 2.99  |
|                             | I <sub>geo</sub> <sup>b</sup> | 0.14                                | 1.25 | 0.57  | 0.46  | 2.82  | -0.84 | -1.17   | 0.58  | 2.27 | 0.20  | 2.78  |
|                             |                               |                                     |      |       |       |       |       |         |       |      |       |       |
| Jubail mosques              | C <sub>f</sub> <sup>a</sup>   | 2.39                                | 5.44 | 0.18  | 0.45  | 2.93  | 0.19  | 0.41    | 0.58  | 4.09 | 0.21  | 10.92 |
|                             | C <sub>f</sub> <sup>b</sup>   | 1.91                                | 2.72 | 1.00  | 1.10  | 7.96  | 0.58  | 0.74    | 1.99  | 3.37 | 0.82  | 9.43  |
| Dammam metropolitan mosques | C <sub>f</sub> <sup>a</sup>   | 2.53                                | 6.06 | 0.26  | 0.51  | 3.79  | 0.20  | 0.29    | 0.64  | 4.34 | 0.24  | 11.89 |
|                             | C <sub>f</sub> <sup>b</sup>   | 2.02                                | 3.03 | 1.43  | 1.23  | 10.33 | 0.60  | 0.52    | 2.18  | 3.57 | 0.94  | 10.28 |
| Jeddah mosques              | C <sub>f</sub> <sup>a</sup>   | 2.07                                | 7.16 | 0.41  | 0.85  | 3.90  | 0.28  | 0.37    | 0.66  | 8.81 | 0.45  | 11.94 |
|                             | C <sub>f</sub> <sup>b</sup>   | 1.66                                | 3.58 | 2.23  | 2.07  | 10.61 | 0.84  | 0.67    | 2.24  | 7.24 | 1.72  | 10.32 |
|                             |                               |                                     |      |       |       |       |       |         |       |      |       |       |
| Jubail mosques              | C <sub>d</sub> <sup>a</sup>   |                                     |      |       |       |       |       | 27.85   |       |      |       |       |
|                             | C <sub>d</sub> <sup>b</sup>   |                                     |      |       |       |       |       | 31.61   |       |      |       |       |
| Dammam metropolitan mosques | C <sub>d</sub> <sup>a</sup>   |                                     |      |       |       |       |       | 30.83   |       |      |       |       |
|                             | C <sub>d</sub> <sup>b</sup>   |                                     |      |       |       |       |       | 36.13   |       |      |       |       |
| Jeddah mosques              | C <sub>d</sub> <sup>a</sup>   |                                     |      |       |       |       |       | 37.00   |       |      |       |       |
|                             | C <sub>d</sub> <sup>b</sup>   |                                     |      |       |       |       |       | 43.17   |       |      |       |       |
|                             |                               |                                     |      |       |       |       |       |         |       |      |       |       |
| Jubail mosques              | PLI <sup>a</sup>              |                                     |      |       |       |       |       | 3.35    |       |      |       |       |
|                             | PLI <sup>b</sup>              |                                     |      |       |       |       |       | 349.91  |       |      |       |       |
| Dammam metropolitan mosques | PLI <sup>a</sup>              |                                     |      |       |       |       |       | 6.19    |       |      |       |       |
|                             | PLI <sup>b</sup>              |                                     |      |       |       |       |       | 563.53  |       |      |       |       |
| Jeddah mosques              | PLI <sup>a</sup>              |                                     |      |       |       |       |       | 30.47   |       |      |       |       |
|                             | PLI <sup>b</sup>              |                                     |      |       |       |       |       | 2378.53 |       |      |       |       |

<sup>a</sup> based on the global crustal average data

<sup>b</sup> based on the local background soil

**Table S5.** Classification values and qualitative description of enrichment factor, geo-accumulation index, contamination factor and ecological risk indices

| Pollution and risk indicators                     | Classification values                     | Qualitative designation of SW dust           |
|---------------------------------------------------|-------------------------------------------|----------------------------------------------|
| Enrichment factor (EF) <sup>a</sup>               | <1                                        | No enrichment                                |
|                                                   | 1–2                                       | Light enrichment                             |
|                                                   | 2–5                                       | Moderate enrichment                          |
|                                                   | 5–20                                      | Significant enrichment                       |
|                                                   | 20–40                                     | Strong enrichment                            |
|                                                   | >40                                       | Extreme enrichment                           |
| Geo-accumulation index ( $I_{geo}$ ) <sup>b</sup> | $I_{geo} \leq 0$                          | Uncontaminated                               |
|                                                   | $0 < I_{geo} \leq 1$                      | Uncontaminated to moderately contaminated    |
|                                                   | $1 < I_{geo} \leq 2$                      | Moderately contaminated                      |
|                                                   | $2 < I_{geo} \leq 3$                      | Moderately to heavily contaminated           |
|                                                   | $3 < I_{geo} \leq 4$                      | Heavily contaminated                         |
|                                                   | $4 < I_{geo} \leq 5$                      | Heavily to extremely contaminated            |
|                                                   | $I_{geo} > 5$                             | Extremely contaminated                       |
| Contamination factor ( $C_f$ ) <sup>c</sup>       | $C_f < 1$                                 | Low contamination                            |
|                                                   | $C_f = (1-3)$                             | Moderate contamination                       |
|                                                   | $C_f = (3-6)$                             | Considerable contamination                   |
|                                                   | $C_f = (>6)$                              | Very high contamination                      |
| Contamination degree ( $C_d$ ) <sup>d</sup>       | $C_d < 8$                                 | Low degree of contamination                  |
|                                                   | $8 < C_d \leq 16$                         | Moderate degree of contamination             |
|                                                   | $16 < C_d \leq 32$                        | Moderate to a strong degree of contamination |
|                                                   | $C_d > 32$                                | Very strong degree of contamination          |
| Pollution load index (PLI) <sup>e,f</sup>         | $PLI < 1$                                 | No pollution                                 |
|                                                   | $1 \leq PLI < 2$                          | Slight pollution                             |
|                                                   | $2 \leq PLI < 3$                          | Moderate pollution                           |
|                                                   | $3 \leq PLI$                              | Heavy pollution                              |
| Ecological risk (ER and ERI) <sup>f, g</sup>      | $ER < 40$ ; $ERI < 150$                   | Lower potential ecological risk              |
|                                                   | $40 \leq ER < 80$ ; $150 \leq ERI < 300$  | Moderate level of potential ecological risk  |
|                                                   | $80 \leq ER < 160$ ; $300 \leq ERI < 600$ | Considerable potential ecological risk       |
|                                                   | $160 \leq ER < 320$ ; $ERI \geq 600$      | Very high potential ecological risk          |
|                                                   | $ER \geq 320$                             | Dangerous                                    |

<sup>a</sup> Li et al. [29]; <sup>b</sup> Zhang et al. [30]; <sup>c</sup> Liu et al. [31]; <sup>d</sup>Yaylali-Abanuz [32]; <sup>e</sup> Gope et al. [33]; <sup>f</sup> Mohammadi et al. [34]; <sup>g</sup>Zhang et al. [30]

## References

1. United States Environmental Protection, Agency (USEPA). Supplemental Guidance for Developing Soil Screening Levels for Superfund Sites; Office of Solid Waste and Emergency Response (OSWER): Washington, DC, USA, 2011.
2. Gope, M., Masto, R.E., George, J., Hoque, R.R., Balachandran, S., 2017. Bioavailability and health risk of some potentially toxic elements (Cd, Cu, Pb and Zn) in street dust of Asansol, India. *Ecotoxicology and Environmental Safety*, 138, 231–241.
3. Peng, C.; Chen, W.; Liao, X.; Wang, M.; Ouyang, Z.; Jiao, W.; Bai, Y. Polycyclic aromatic hydrocarbons in urban soils of Beijing: Status, sources, distribution and potential risk. *Environ. Pollut.* 2011, 159, 802–808.
4. Zheng, N., Liu, J., Wang, Q., Liang, Z., 2010. Health risk assessment of heavy metal exposure to street dust in the zinc smelting district, Northeast of China. *Sci. Total Environ.* 408, 726–733.
5. ESAG. Environmental Site Assessment Guideline; DB11/T656–2009; Adelaide Airport: Adelaide, Australia, 2009. (In Chinese).
6. United States Environmental Protection, Agency (USEPA). Child-Specific Exposure Factors Handbook; EPA-600-P-00e002B; National Center for Environmental Assessment: Washington, DC, USA, 2002.
7. United States Environmental Protection, Agency (USEPA). Risk Assessment Guidance for Superfund: Volume III—Part A, Process for Conducting Probabilistic Risk Assessment; EPA540-R-02-002; U.S. Environmental Protection Agency: Washington, DC, USA, 2001a.
8. United States Environmental Protection, Agency (USEPA). Child-Specific Exposure Factors Handbook; EPA-600-P-00-002B; National Center for Environmental Assessment: Washington, DC, USA, 2001b.
9. Hu, X.; Zhang, Y.; Luo, J.; Wang, T.J.; Lian, H.Z.; Ding, Z.H. Bioaccessibility and health risk of arsenic, mercury and other metals in urban street dusts from a mega-city, Nanjing, China. *Environ. Pollut.* 2011, 159, 1215–1221.
10. Lu, X., Wang, ., Li, LY, Lei, K., Huang, L., Kang, D. Multivariate statistical analysis of heavy metals in street dust of Baoji NW China. *J Hazard Mater* 2010;173:744-749.
11. United States Environmental Protection, Agency (USEPA). Risk Assessment Guidance for Superfund, Vol.I: Human Health Evaluation Manual (PartA); EPA/540/1-89/002; Office of Emergency and Remedial Response: Washington, DC, USA, 1989
12. USEPA. Risk Assessment Guidance for Superfund. Volume I: Human Health Evaluation Manual (Part E, Supplemental Guidance for Dermal Risk Assessment). EPA/540/R/99; 2004.
13. Li, R.Z.; Zhou, A.J.; Tong, F.; Wu, Y.D.; Zhang, P.; Yu, J. Distribution of metals in urban dusts of Hefei and health risk assessment. *Chin. J. Environ. Sci.* 2011, 32, 2661–2668.
14. Wei, X., Gao, B., Wang, P., Zhou, H., Lu, J., 2015. Pollution characteristics and health risk assessment of heavy metals in street dusts from different functional areas in Beijing, China. *Ecotoxicol. Environ. Saf.* 112, 186–192.

15. Ali, MU, Liu, G, Yousaf, B, Abbas, Q, Ullah, H, Munir, MAM, Fu, B. Pollution characteristics and human health risks of potentially (eco) toxic elements (PTEs) in road dust from metropolitan area of Hefei, China. *Chemosphere* 2017;181:111-121.
16. Shabbaj, II, Alghamdi, MA, Shamy, M, Hassan, SK, Alsharif, MM, Khoder, MI. Risk Assessment and Implication of Human Exposure to Road Dust Heavy Metals in Jeddah, Saudi Arabia. *Int J Environ Res Public Health* 2018;15:36.
17. Li, H-H, Chen, L-J, Yu, L, Guo, Z-B, Shan, C-Q, Lin, J-Q, Gu, Y-G, Yang, Z-B, Yang, Y-X, Shao, J-R, Zhu, X-M, Cheng, Z. Pollution characteristics and risk assessment of human exposure to oral bioaccessibility of heavy metals via urban street dusts from different functional areas in Chengdu, China. *Sci Tot Environ* 2017;586:1076-1084.
18. Alghamdi, MA, Hassan, SK, Alzahrani, NA, Almeahmadi, FM, Khoder MI. Risk assessment and implications of schoolchildren exposure to classroom heavy metals particles in Jeddah, Saudi Arabia. *Int J Environ Res Pub Health* 2019;16:5017.
19. Patel, DK, Jain, MK. Contamination and health risk assessment of potentially harmful elements associated with roadside dust in Dhanbad India. *Stochastic Environ Res Risk Assess* 2022;36:389-407.
20. Zheng, X, Zhao, W, Yan, X, Shu, T, Xiong, Q, Chen, F. Pollution characteristics and health risk assessment of airborne heavy metals collected from Beijing Bus Stations. *Intl J Environ Res Pub Health* 2015;12:9658-9671.
21. Kamunda, C, Mathuthu, M, Madhuku, M. Health risk assessment of heavy metals in soils from Witwatersrand Gold Mining Basin, South Africa. *Intl J Environ Res Public Health* 2016;13:663.
22. Ying, L, Shaogang, L, Xiaoyang, C. Assessment of heavy metal pollution and human health risk in urban soils of a coal mining city in East China. *Hum Ecol Risk Assess* 2016;22:1359-1374.
23. Adimalla, N. Heavy metals contamination in urban surface soils of Medak province, India, and its risk assessment and spatial distribution. *Environ Geochem Health* 2019;42:59-75.
24. Huang, SL, Li, Q, Xu, DS. Heavy metal pollution in Suzhou urban soils and its health risk assessment. *Adv Mater Res* 2012;534:244-248.
25. Lu, X, Zhang, X, Li, LY, Chen, H. Assessment of metals pollution and health risk in dust from nursery schools in Xi'an, China. *Environ Res* 2014;128:27-34.
26. Pavilonis, B, Grassman, J, Johnson, G, Diaz, Y, Caravanos, J. Characterization and risk of exposure to elements from artisanal gold mining operations in the Bolivian Andes. *Environ Res* 2017;154:1-9.
27. Bello, S, Muhammad, BG, Bature, B. Total excess lifetime cancer risk estimation from enhanced heavy metals concentrations resulting from tailings in Katsina Steel Rolling Mill, Nigeria. *J Mater Sci Eng* 2017;6:338.
28. Johnbull, O, Abbassi, B, Zytner, RG. Risk assessment of heavy metals in soil based on the geographic information system - Kriging technique in Anka, Nigeria. *Environ Eng Res* 2019;24:150-158.
29. Li, N., Han, W., Tang, J., Bian, J., Sun, S., Song, T., 2018. Pollution characteristics and human health risks of elements in road dust in Changchun, China. *International Journal of Environmental Research and Public Health* 15(9), 1843.

30. Zhang, J, Hua, P, Krebs. P. Influences of land use and antecedent dry-weather period on pollution level and ecological risk of heavy metals in road-deposited sediment. *Environ Pollut* 2017;228:158-68.
31. Liu, E., Wang, X., Liu, H., Liang, M., Zhu, Y., Li, Z., 2019. Chemical speciation, pollution and ecological risk of toxic metals in readily washed off road dust in a megacity (Nanjing), China. *Ecotoxicology and Environmental Safety* 173:381-92.
32. Yaylali-Abanuz, G., 2011. Heavy metal contamination of surface soil around Gebze industrial area, Turkey. *Microchem J.* 99(1), 82-92.
33. Gope, M., Masto. R.E., George. J., Balachandran. S., 2018. Tracing source, distribution and health risk of potentially harmful elements (PHEs) in street dust of Durgapur, India. *Ecotoxicol Environ Saf* 154, 280-293.
34. Mohammadi A, Hajizadeh Y, Taghipour H, Arani AM, Mokhtari M, Fallahzadeh H., 2018. Assessment of metals in agricultural soil of surrounding areas of Urmia Lake, northwest Iran: A preliminary ecological risk assessment and source identification. *Human and Ecological Risk Assessment* 24, 2070-2087.
